# Supplementary material
Source: PubMed Central journal article supplement (PMC4750412)
Supplement: supp_fj.15-277798_Supplemental_Figure1.pdf [file supp_fj.15-277798_Supplemental_Figure1.pdf]

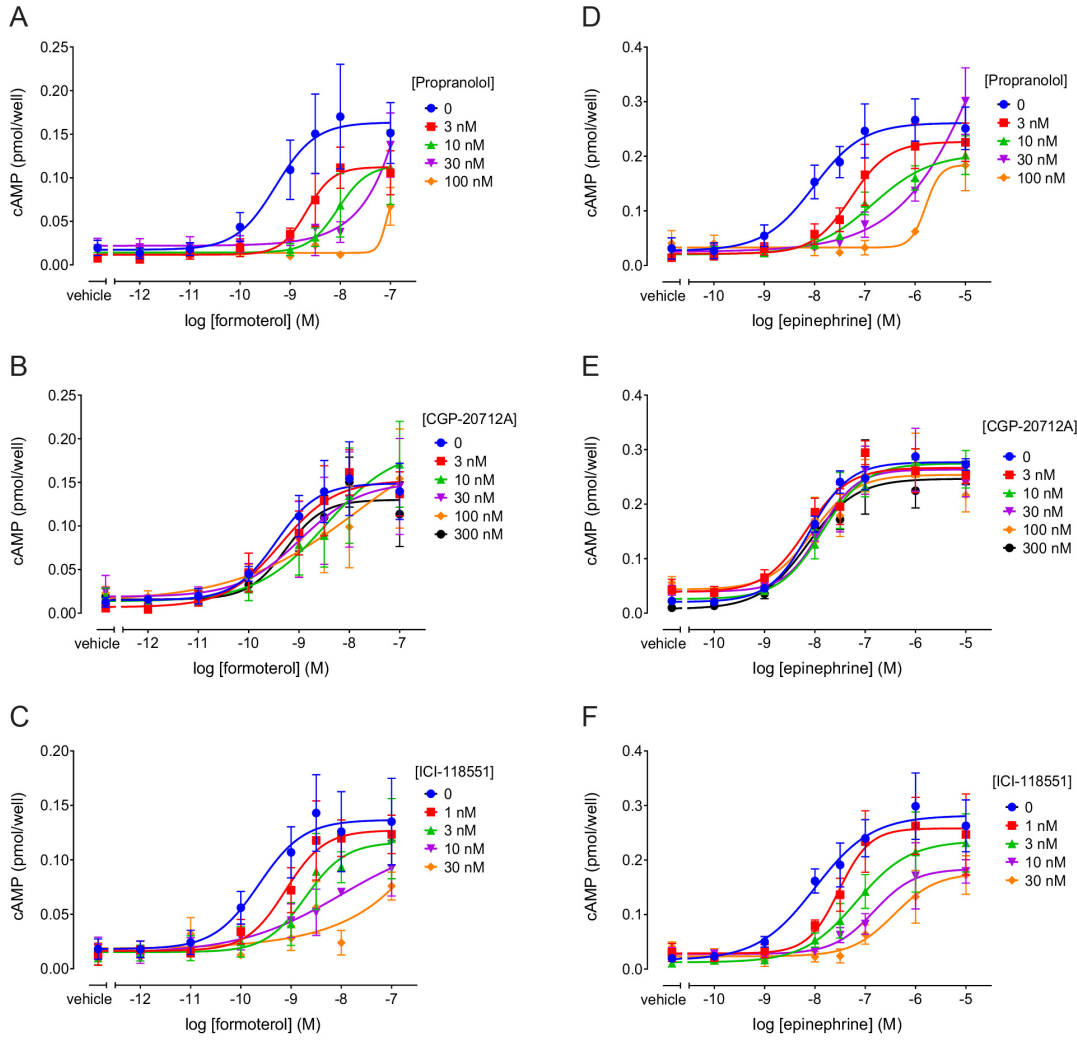

**Supplementary Figure 1. cAMP Schild plots.** Formoterol concentration-response curves in the presence of increasing concentrations of (A) propranolol, (B) CGP-20712A or (C) ICI-118551 ( $n=3$ ). Epinephrine concentration-response curves in the presence of (D) propranolol, (E) CGP-20712A or (F) ICI-118551 ( $n=3$ ). Symbols represent means, error bars S.E.M.
