# Supplementary material
Source: PubMed Central journal article supplement (PMC4750412)
Supplement: supp_fj.15-277798_Supplemental_Figure2.pdf [file supp_fj.15-277798_Supplemental_Figure2.pdf]

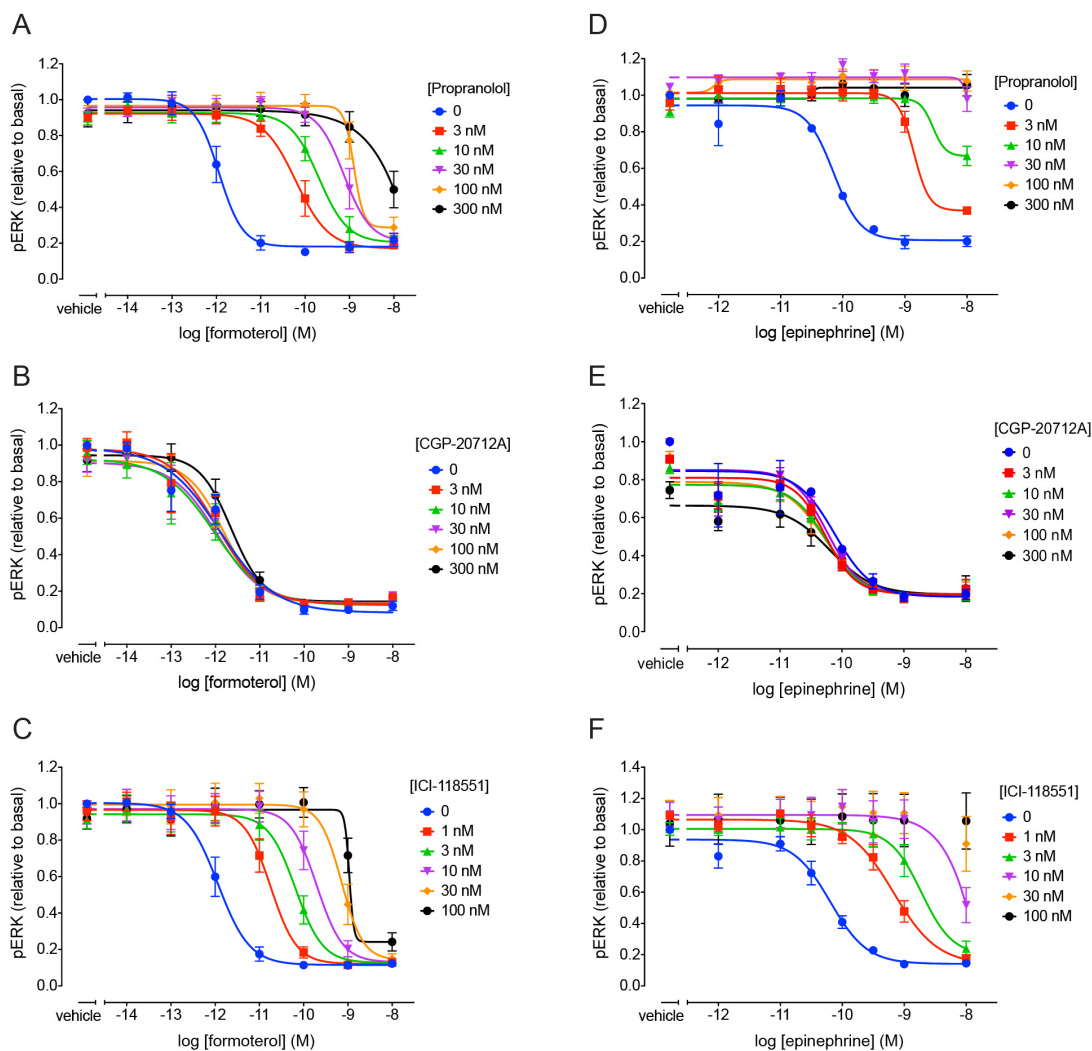

**Supplementary Figure 2. pERK Schild plots.** Formoterol concentration-response curves in the presence of increasing concentrations of (A) propranolol, (B) CGP-20712A or (C) ICI-118551 (n=5). Epinephrine concentration-response curves in the presence of increasing concentrations of (D) propranolol, (E) CGP-20712A or (F) ICI-118551 (n=3-4). Symbols represent means, error bars S.E.M.
