# Supplementary material
Source: PubMed Central journal article supplement (PMC4750412)
Supplement: supp_fj.15-277798_Supplemental_Figure3.pdf [file supp_fj.15-277798_Supplemental_Figure3.pdf]

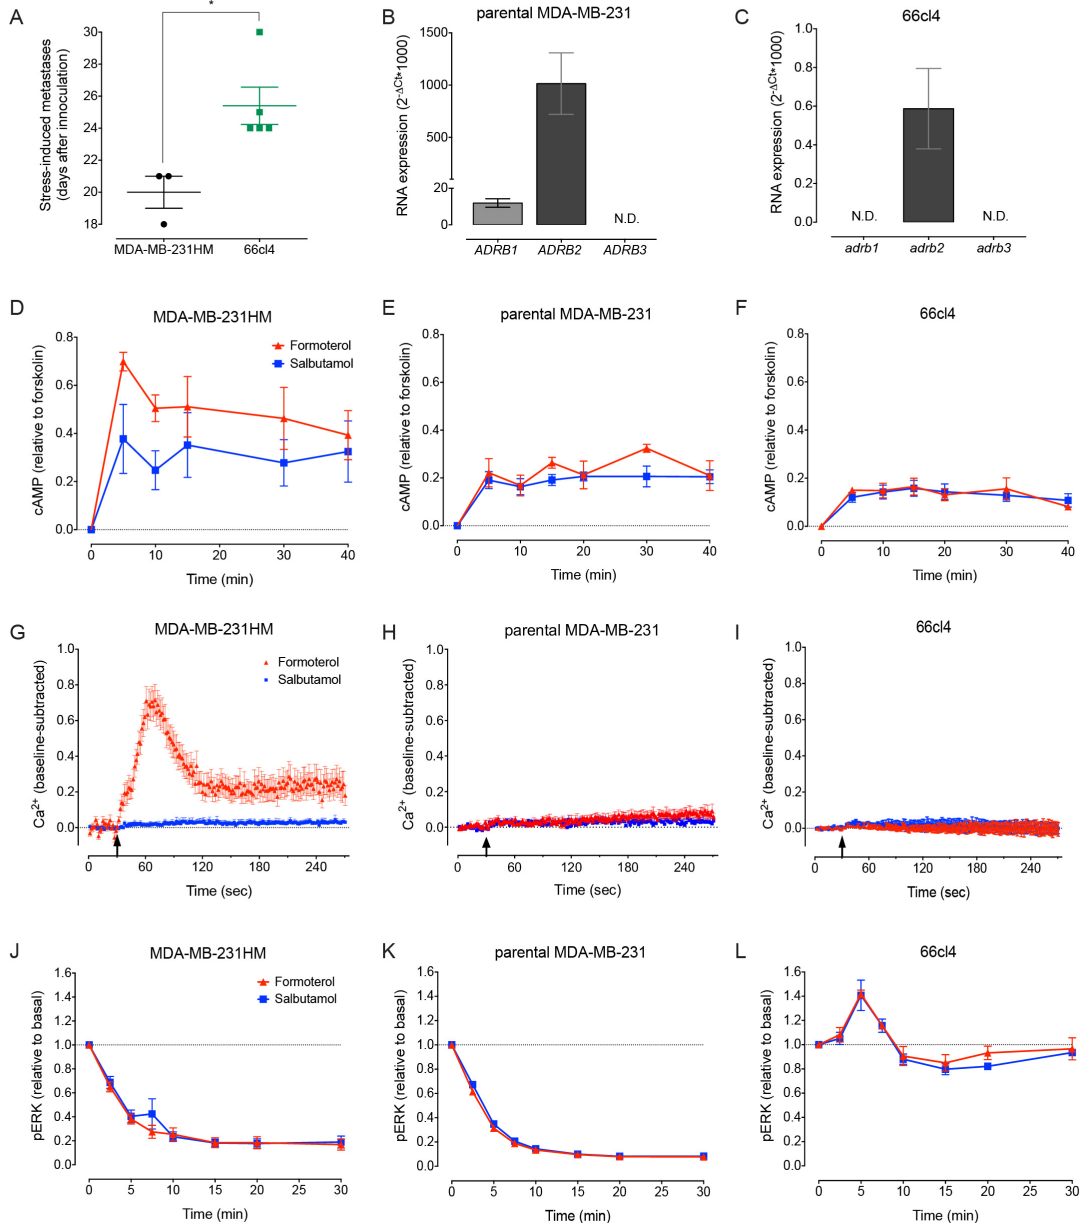

**Supplementary Figure 3. Comparison of signaling in MDA-MB-231HM, parental MDA-MB-231 and 66cl4 cells.** (A) Stress accelerates metastases in MDA-MB-231HM vs. 66cl4 mouse orthotopic models of breast cancer (n=3-5). (B) Parental MDA-MB-231 express  $\beta_1$ AR and  $\beta_2$ AR (n=2). (C) 66cl4 only express  $\beta_2$ AR (n=3).  $\beta_2$ AR agonists (formoterol and salbutamol, 10  $\mu$ M) stimulate cAMP in (C) MDA-MB-231HM but smaller cAMP increases in (D) parental MDA-MB-231 and (E) 66cl4 (n=3).  $\beta_2$ AR agonists (D) increase Ca<sup>2+</sup> in MDA-MB-231HM, but have no effect in (E) parental MDA-MB-231 and (F) 66cl4 (n=3).  $\beta_2$ AR agonists inhibit pERK in (G) MDA-MB-231HM and (H) parental MDA-MB-231, but (I) stimulate pERK in 66cl4 (n=3). Data are mean $\pm$ S.E.M. or S.D. (B only). \* p<0.05, unpaired t-test Welch's correction.
